# Supplementary material for: Tracing Geographic and Molecular Footprints of Copepod Crustaceans Causing Multifocal Purple Spots Syndrome in the Caribbean Sea Fan Gorgonia ventalina
Source: Preprints.org preprint supplement (doi:10.20944/preprints202312.0266.v1), 2023-12-05
Supplement: Supplementary file 2 [file supplementary]

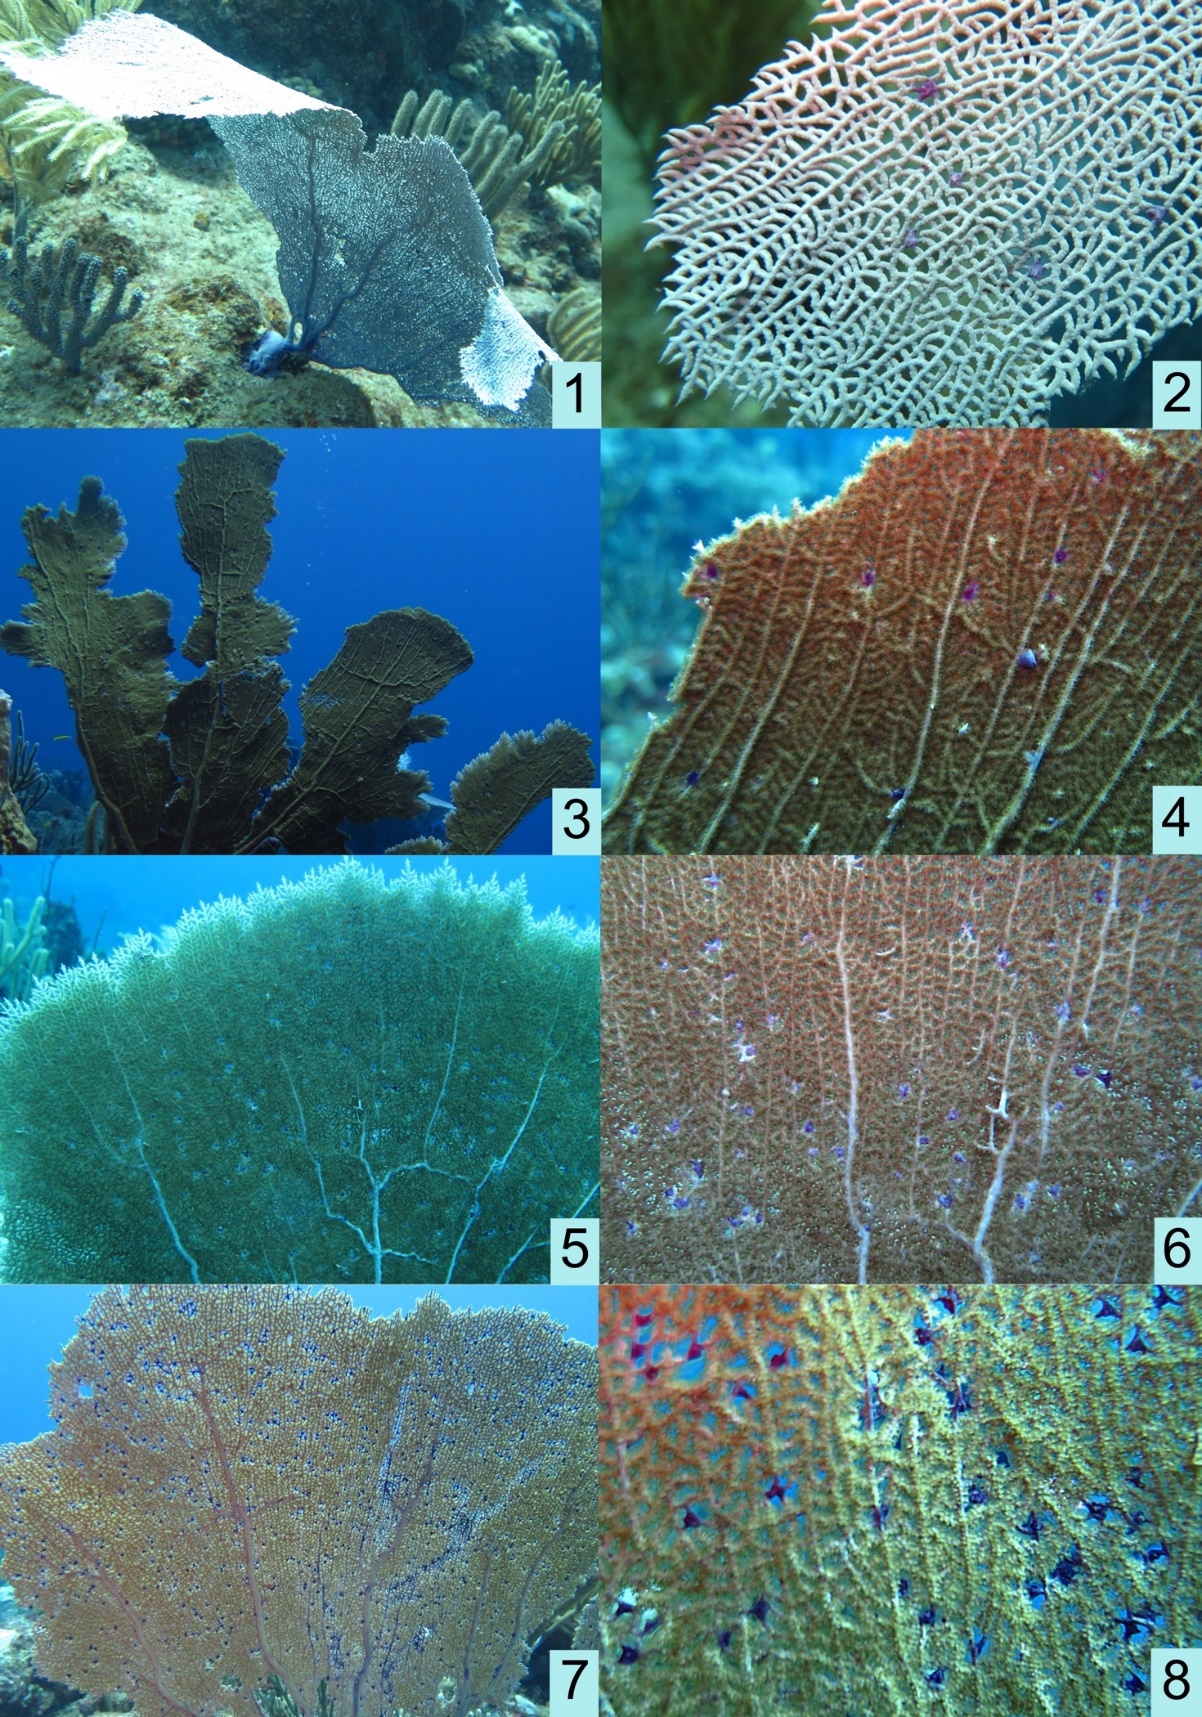
 **Figure S1.** Specimens of *Gorgonia ventalina* (Linnaeus 1758) labeled as follows: Statia15-99 – 1, 2; Statia15-134 – 3, 4; Statia15-135 – 5, 6; Statia15-141 – 7, 8.


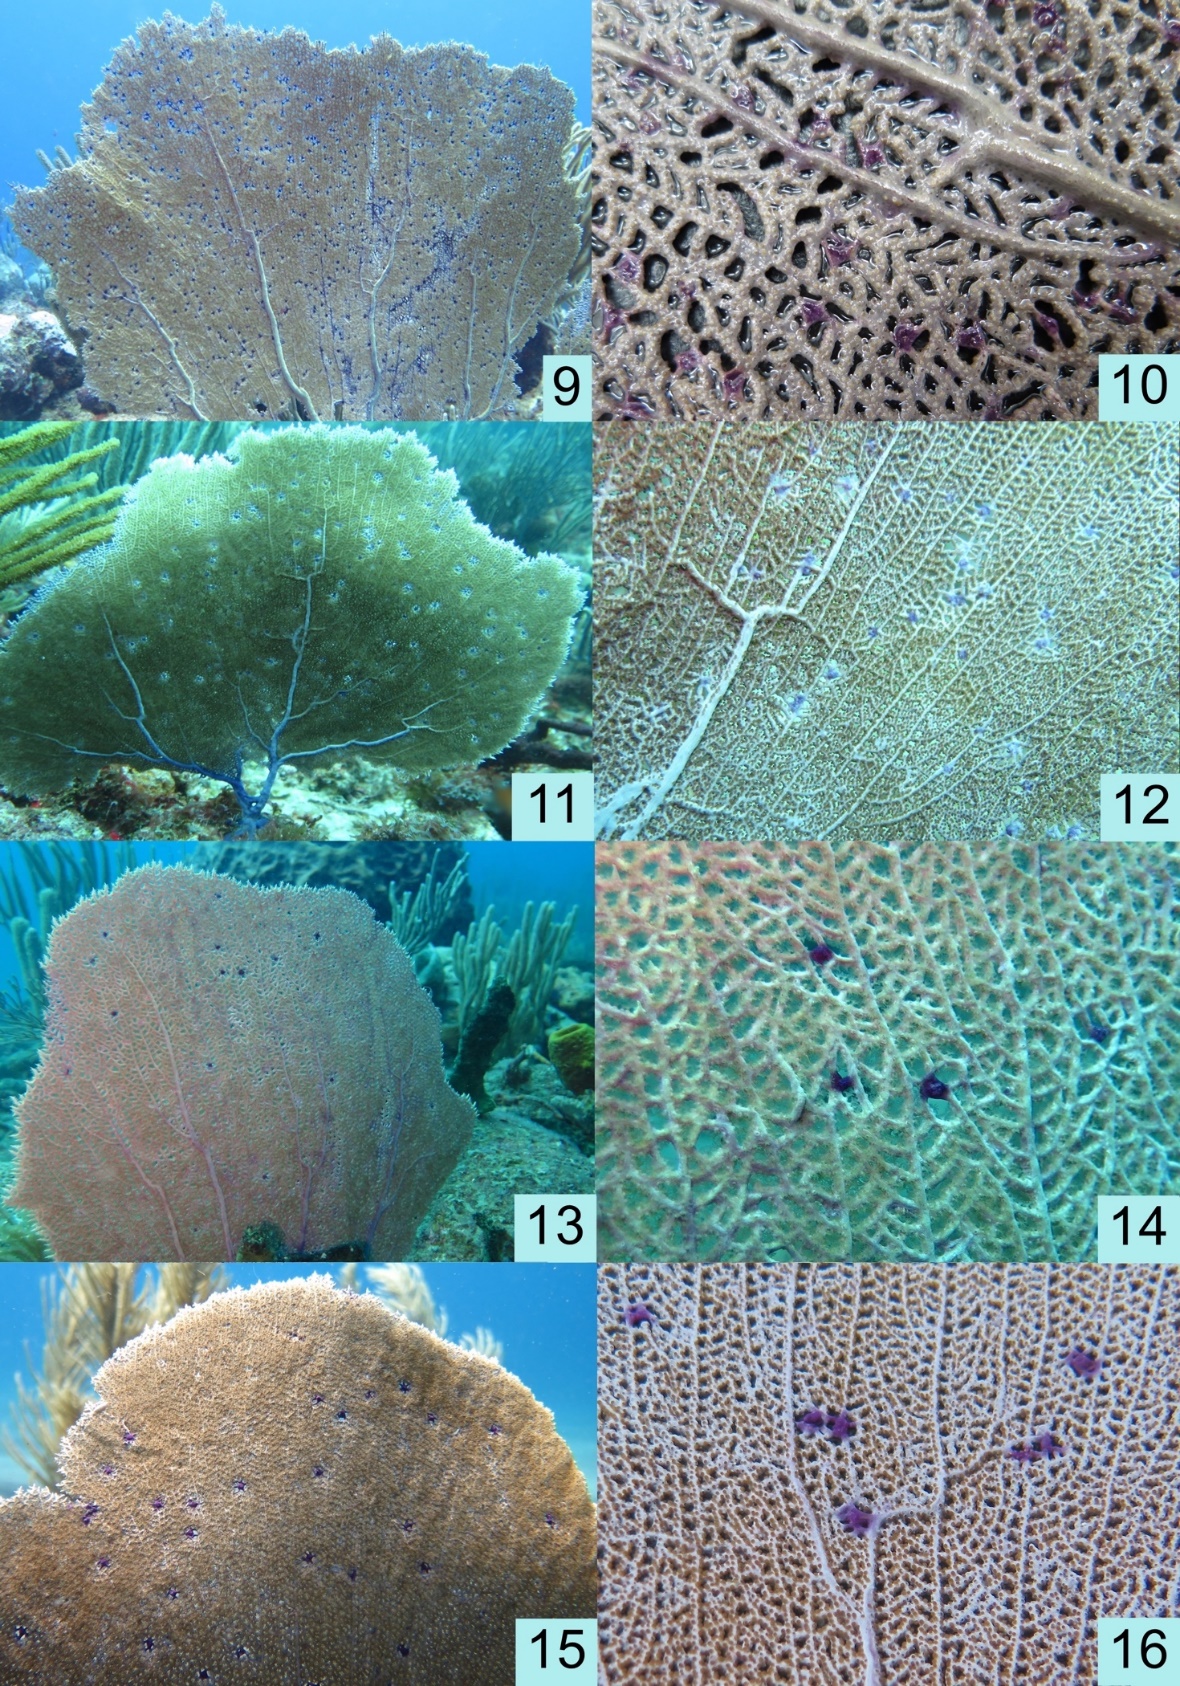


**Figure S2.** Specimens of *Gorgonia ventalina* (Linnaeus 1758) labeled as follows: Statia15-142 – 9, 10; Statia15-146 – 11, 12; Statia15-163 – 13, 14; Statia15-170 – 15, 16.


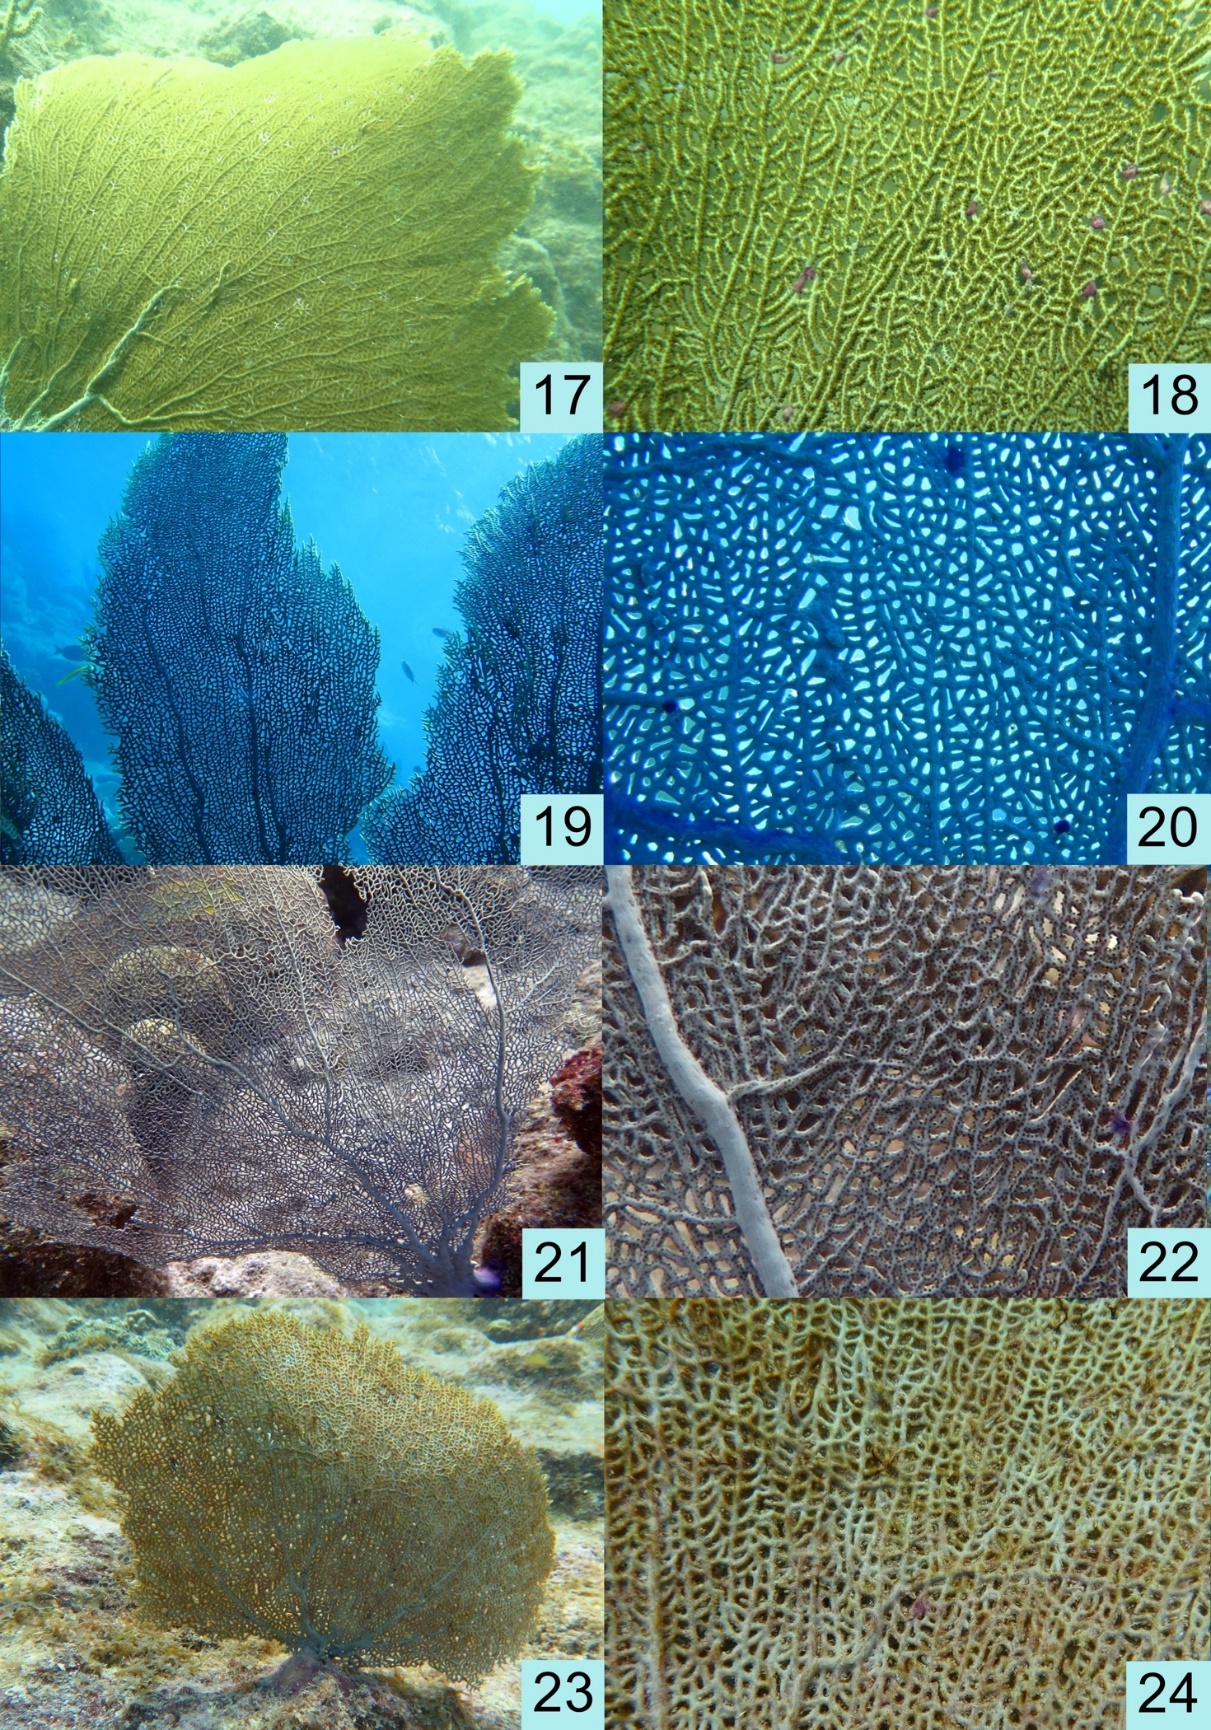


**Figure S3.** Specimens of *Gorgonia ventalina* (Linnaeus 1758) labeled as follows: Statia15-174 – 17, 18; CUR17-39 – 19, 20; CUR17-81 – 21, 22; CUR17-88 – 23, 24.


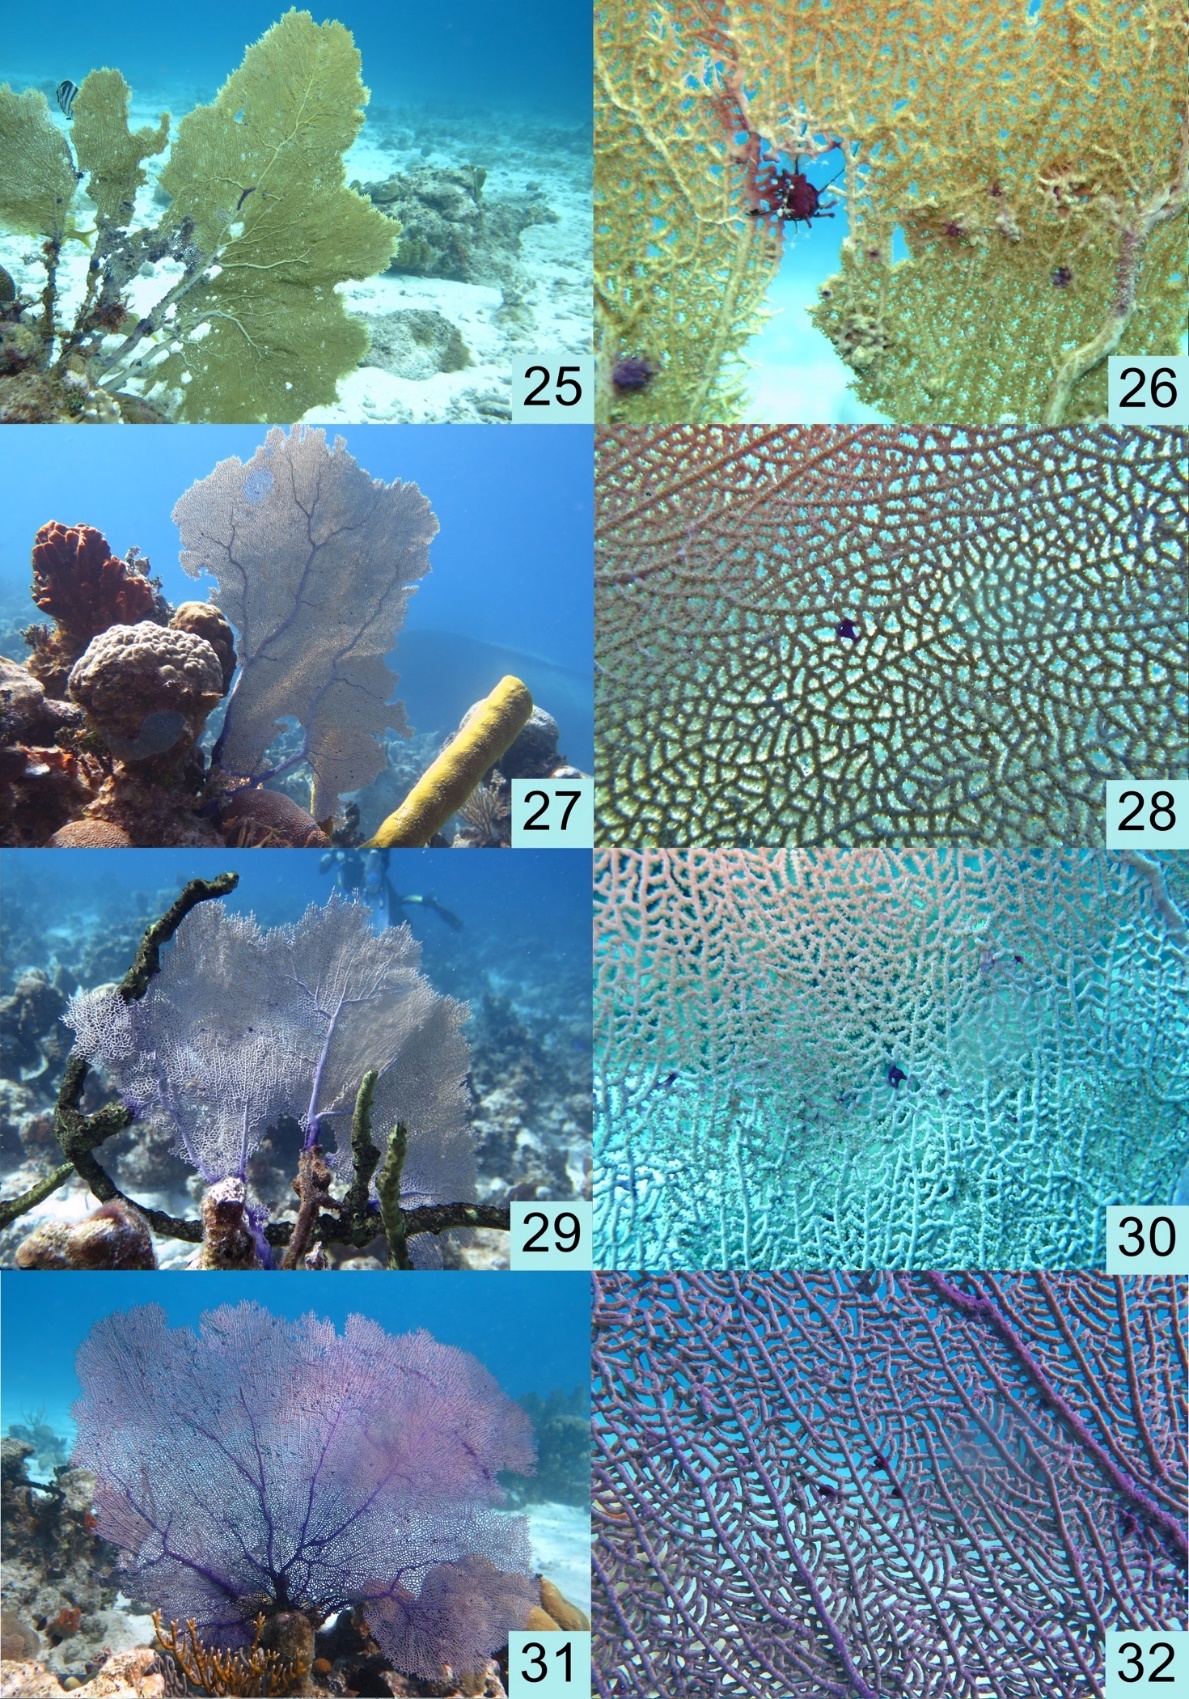


**Figure S4**. Specimens of *Gorgonia ventalina* (Linnaeus 1758) labeled as follows: CUR17-96 – 25, 26; Cuba19-1 – 27, 28; Cuba19-2 – 29, 30; Cuba19-3 – 31, 32.


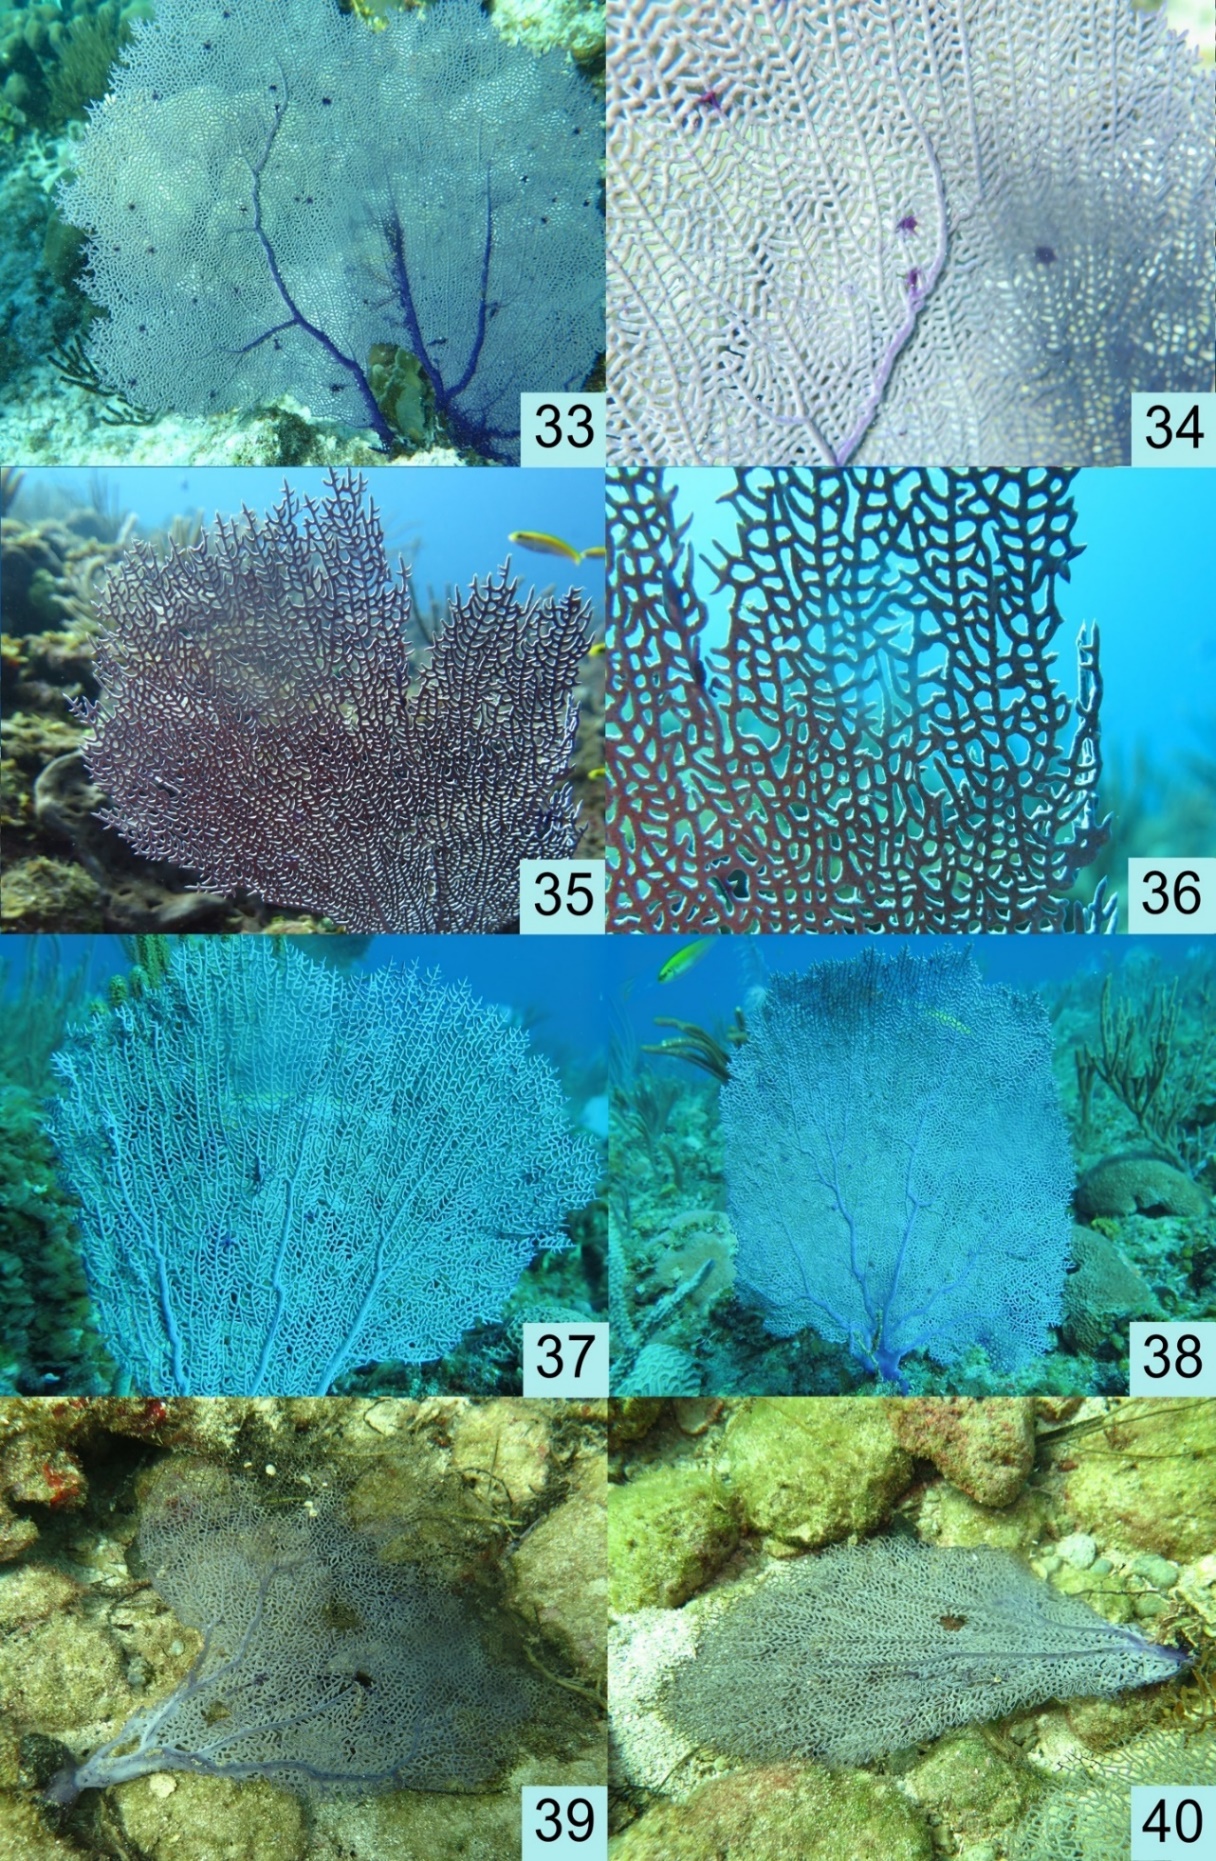


**Figure S5.** Specimens of *Gorgonia ventalina* (Linnaeus 1758) labeled as follows: Cuba19-5 – 33, 34; Cuba19-21 – 35, 36; Cuba19-22 – 37; Cuba19-25 – 38, no; Cuba19-32 – 39, no; Cuba19-33 – 40.


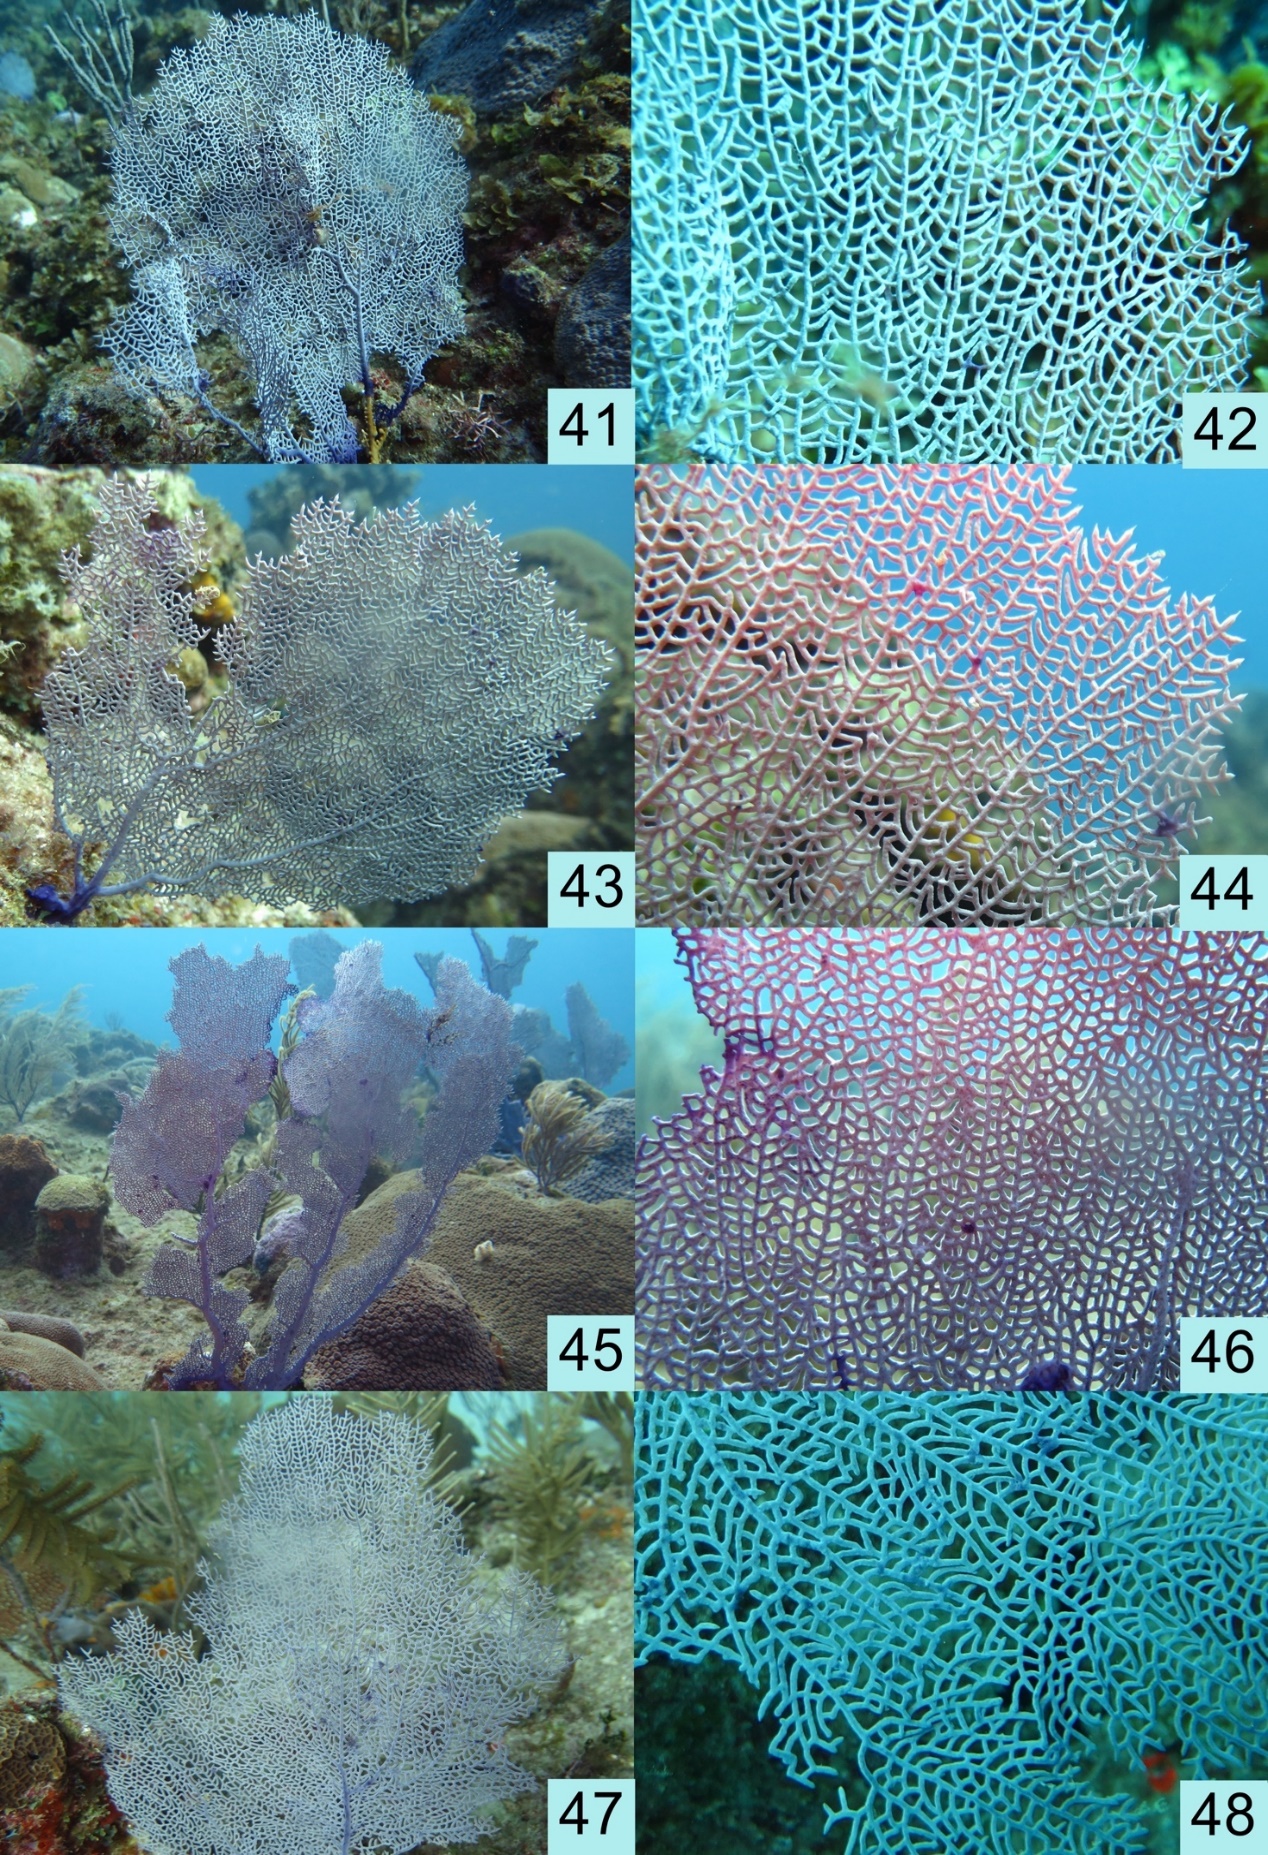


**Figure S6.** Specimens of *Gorgonia ventalina* (Linnaeus 1758) labeled as follows: Cuba19-23 – 41, 42; Cuba19-27 – 43, 44; Cuba19-28 – 45, 46; Cuba19-30 – 47, 48.


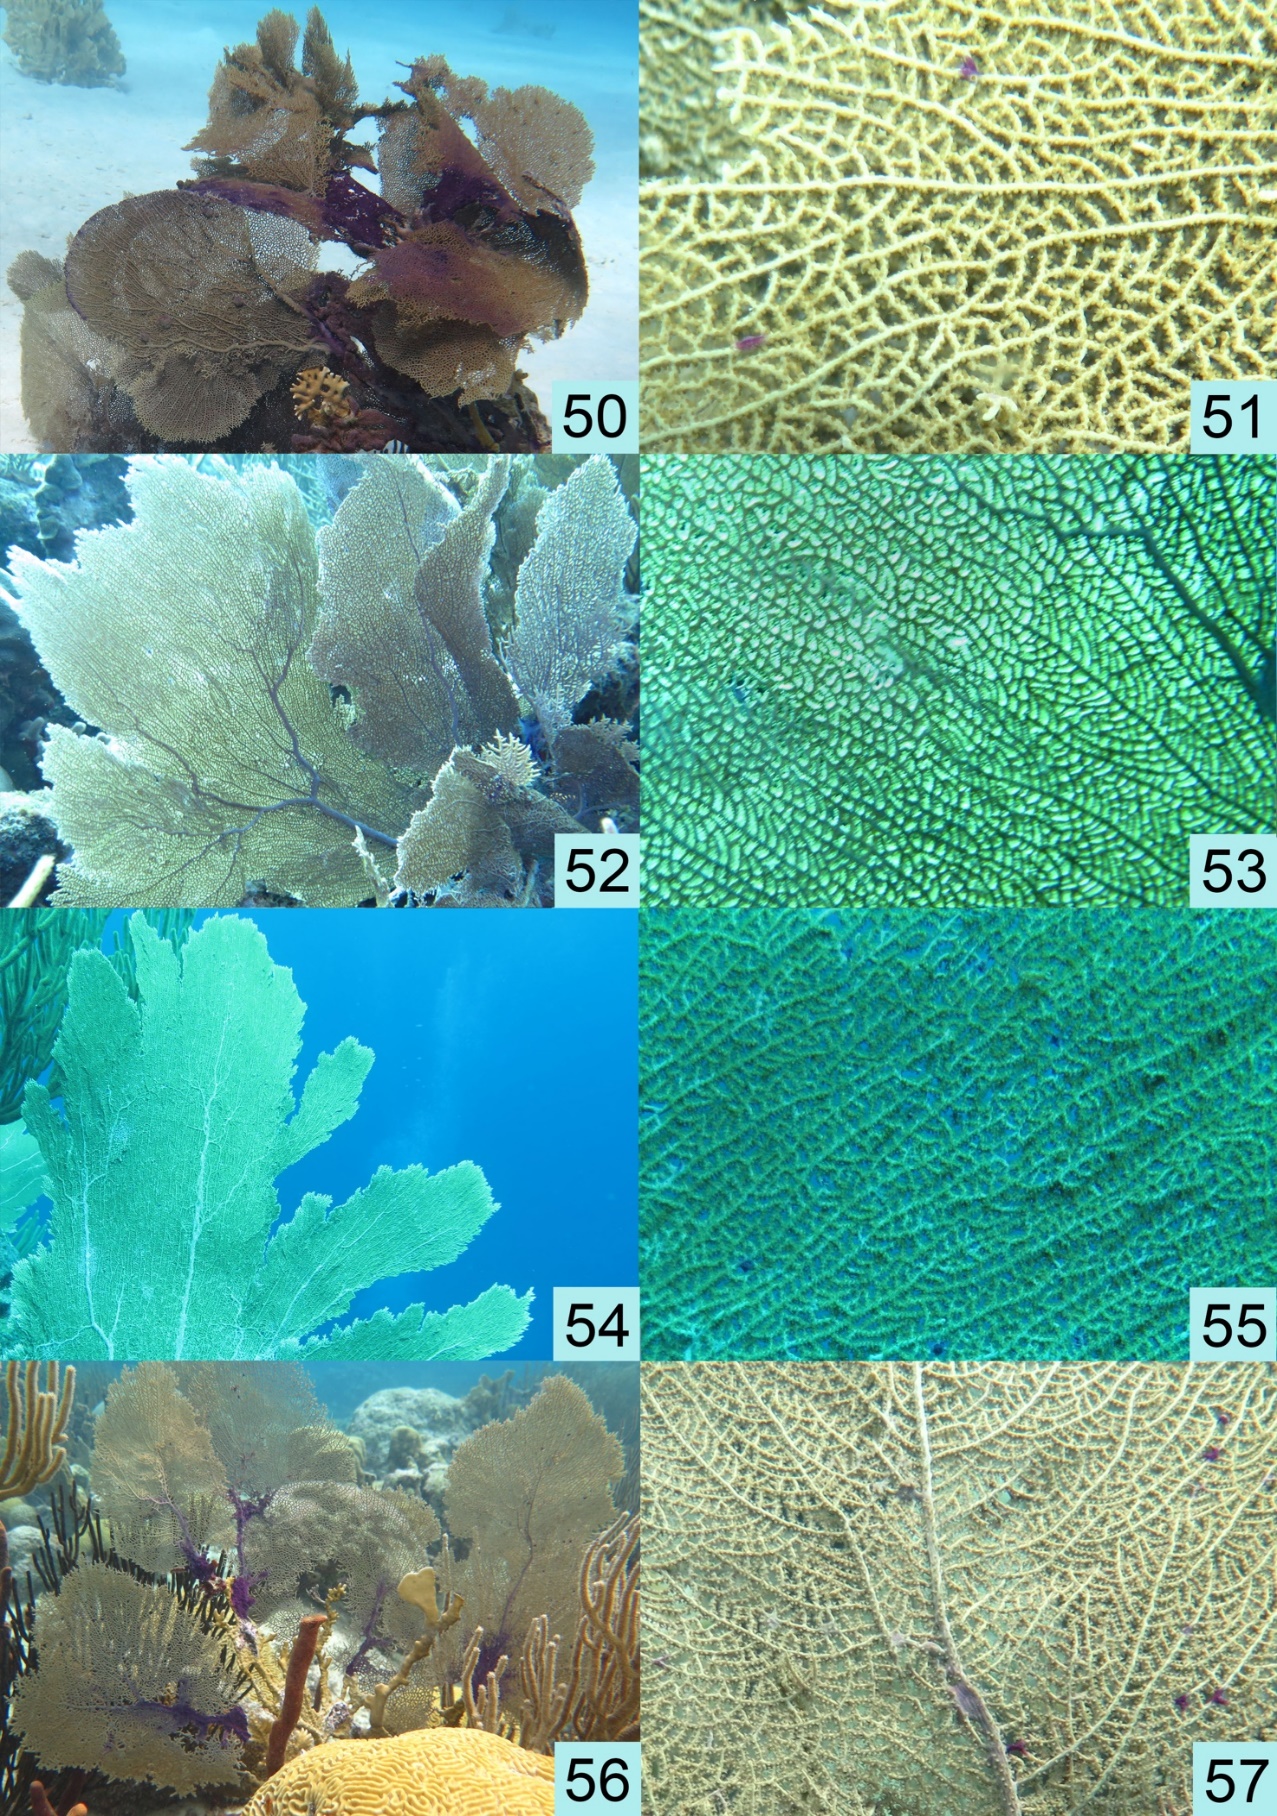


**Figure S7.** Specimens of *Gorgonia ventalina* (Linnaeus 1758) labeled as follows: Bonaire19-28 – 50, 51; Bonaire19-31 – 52, 53; Bonaire19-47 – 54, 55; Bonaire19-91 – 56, 57.


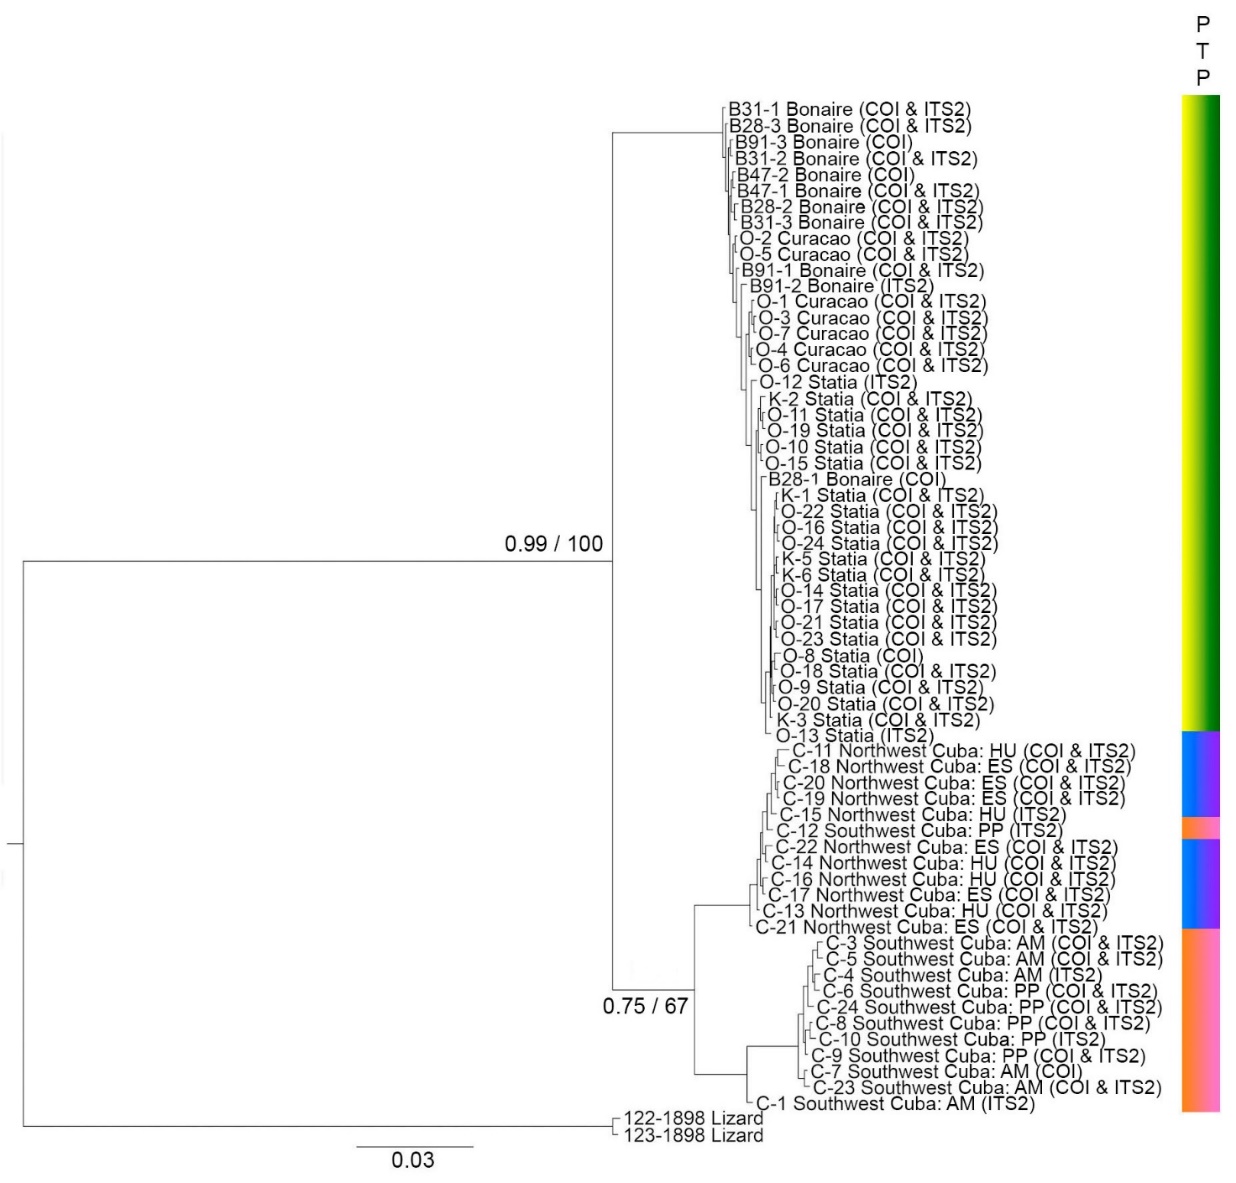


**Figure S8.** The phylogenetic tree was constructed based on the concatenated alignment of COI (Cytochrome c oxidase subunit I) and ITS2 (Internal Transcribed Spacer 2) sequences of Lamippidae copepods, including *Sphaerippe* spp. Model of nucleotide evolution is HKY+G for COI_pos1, K81UF+I for ITS and COI_pos2, HKY+I for COI_pos3. Numbers in the nodes is posterior probabilities / bootstrap supports. Color bars on the right denote the species delimitation results. For additional details, including geographic coordinates, please refer to Table 1 and Table S4.

**Figure S9.** In the Bayesian (BA) phylogenetic tree based on the alignment of 18S sequences of crustacean copepods, as indicated in Table S6, the nucleotide evolution model applied was GTR + G + I. The numbers associated with the nodes represent Bayesian (BA) posterior probabilities. For additional information, refer to Figure 6 and Supplementary Figure 10 (Figure 6 and Figure S10).

**Figure S10.** Maximum Likelihood phylogenetic tree based on the 18S alignment of copepod crustaceans indicated in Table S6. The nucleotide evolution model applied is GTR + G + I. The numbers associated with the nodes represent bootstrap support values. For additional information, refer to Figure 6 and Supplementary Figure 9 (Figure 6 and Figure S9).
